# Supplementary material
Source: PubMed Central journal article supplement (PMC3591993)
Supplement: JB.02142-12_zjb999092486so1.pdf [file JB.02142-12_zjb999092486so1.pdf]

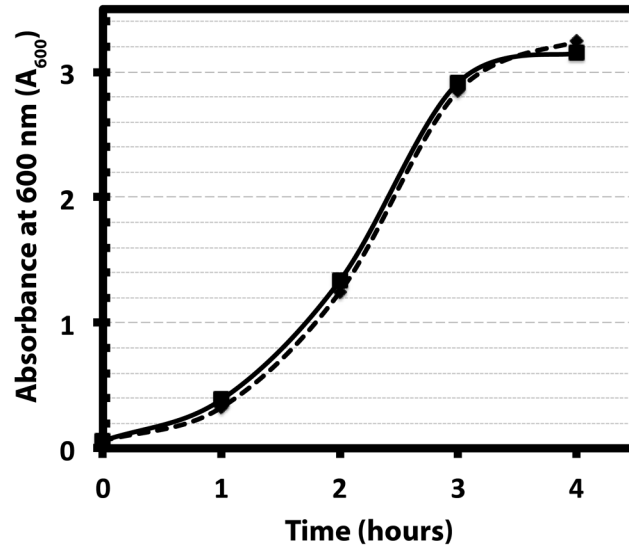

1

2 **FIG S1. In haploid, the *lptE14* mutant grows as well as *lptE*<sup>+</sup>.** Stationary-phase  
3 cultures of  $\Delta lptE2::kan$  strains carrying either  $plptE^+$  (JY33) (solid line) or  $plptE14$   
4 (JY35) (dashed line) were sub-cultured into fresh LB media supplemented with 0.2%  
5 arabinose and grown at 37°C, with culture density ( $A_{600}$ ) measured hourly.

6

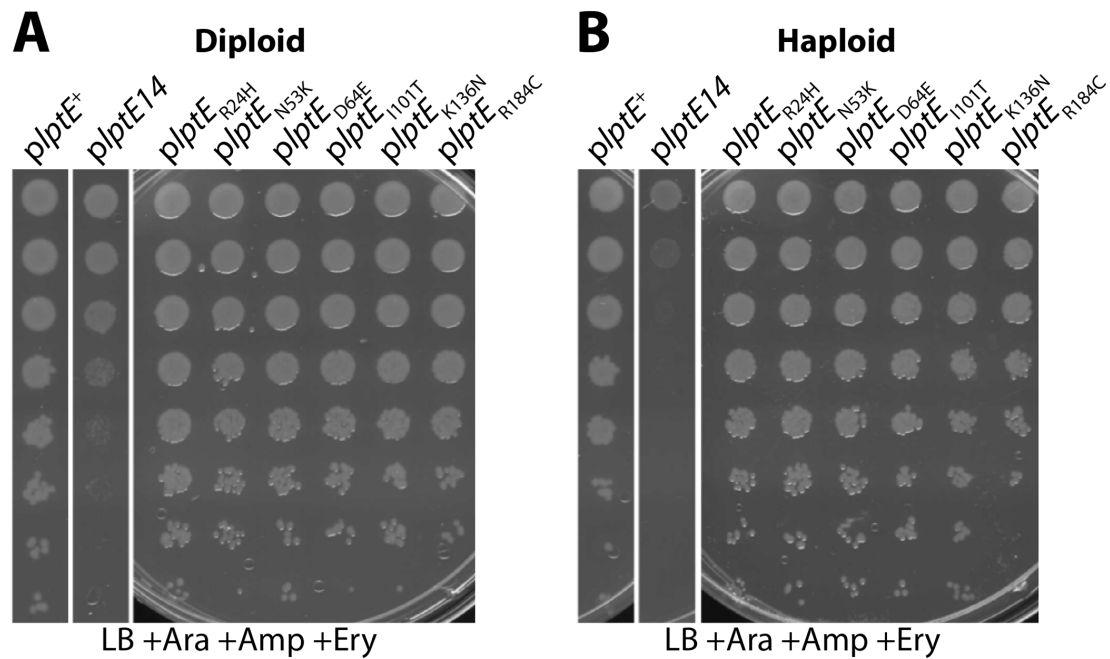

**FIG S2. Individual substitution mutations of *lptE14* do not increase OM**

**permeability.** Stationary-phase cultures of plasmid-carrying diploid strains expressing native *lptE*<sup>+</sup> (**A**) or haploid  $\Delta lptE2::kan$  strains (**B**) were serially diluted and replica plated onto non-selective LB with ampicillin and 0.2% arabinose plates or plates additionally supplemented with 50  $\mu$ g/ml erythromycin. Plates were incubated at 37°C.

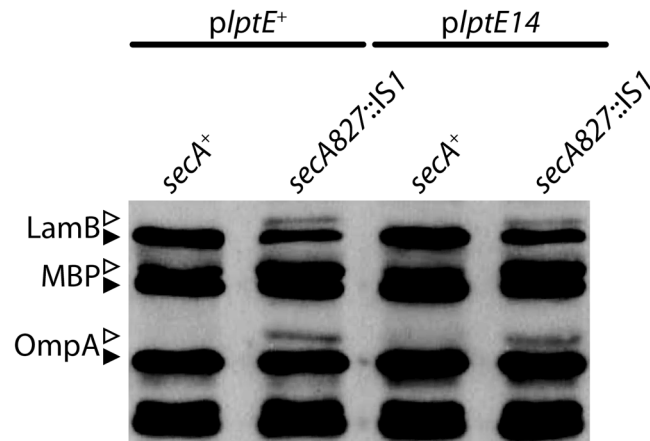

**FIG S3. *secA827::IS1* causes an accumulation of OMP pre-protein.** Protein samples were taken from logarithmic-phase cultures of *lptE* haploid strains carrying *plptE*<sup>+</sup> with *secA*<sup>+</sup> (JY105) or with *secA827::IS1* (JY106) insertion, and strains carrying *plptE14* with *secA*<sup>+</sup> (JY107) or with *secA827::IS1* (JY108), and immunoblotted with anti-LamB, anti-MBP, and anti-OmpA. Mature protein forms are indicated by black triangles. Additionally, LamB, MBP and OmpA can be detected as signal sequence-bearing preprotein in *secA827::IS1* strains are indicated by white triangles.
